# Supplementary material for: Comparison of antidiabetic drugs added to sulfonylurea monotherapy in patients with type 2 diabetes mellitus: A network meta-analysis
Source: PubMed Central journal article supplement (PMC6110472; doi:10.1371/journal.pone.0202563), 2018-08-27
Supplement: pone.0202563.s002.pdf [file pone.0202563.s002.pdf]

**S2 Table.** Search Strategies

| Data source    | Search terms                                                                                                                                                                                                                                                                                                                                                                                                                                                                                                                                                                                                                                                                                                                                                                                                                                                                                                                                                                                                                                                                                                                                                            |
|----------------|-------------------------------------------------------------------------------------------------------------------------------------------------------------------------------------------------------------------------------------------------------------------------------------------------------------------------------------------------------------------------------------------------------------------------------------------------------------------------------------------------------------------------------------------------------------------------------------------------------------------------------------------------------------------------------------------------------------------------------------------------------------------------------------------------------------------------------------------------------------------------------------------------------------------------------------------------------------------------------------------------------------------------------------------------------------------------------------------------------------------------------------------------------------------------|
| <b>PubMed</b>  | <p>#1 Sodium glucose co-transporter 2</p> <p>#2 SGLT2 OR SGLT-2 OR SGLT 2</p> <p>#3 Tofogliflozin OR Empagliflozin OR Dapagliflozin OR Canagliflozin OR Sotagliflozin OR Luseogliflozin OR Ipragliflozin OR Remogliflozin OR Sergliflozin OR Ertugliflozin</p> <p>#4 OR#1 - #3</p> <p>#5 DPP-4 OR DDP4 OR DPP 4</p> <p>#6 Vildagliptin OR Saxagliptin OR Sitagliptin OR Linagliptin OR Alogliptin OR Dutogliptin OR Gemigliptin OR Camegliptin OR Teneigliptin</p> <p>#7 #5 OR #6</p> <p>#8 Metformin</p> <p>#9 Alpha glucosidase inhibitor OR Acarbose OR Miglitol OR Voglibose</p> <p>#10 Glitazone OR Thiazolidinedione OR Pioglitazone OR Rivoglitazone OR Rosiglitazone</p> <p>#11 GLP-1 OR Exenatide OR Liraglutide OR Lixisenatide OR Albiglutide OR Dulaglutide OR Semaglutide OR Taspoglutide</p> <p>#12 Insulin OR Aspart OR Glulisine OR Lispro OR Glargine OR Degludec OR Detemir OR Isophane</p> <p>#13 #4 OR #7 OR #8 OR #9 OR #10 OR #11 OR #12</p> <p>#14 Diabetes mellitus or Diabetes</p> <p>#15 random*</p> <p>#16 "Randomized Controlled Trial"[Publication Type]</p> <p>#17 RCT or RCTs</p> <p>#18 OR/#15 - #17</p> <p>#19 #13 AND #14 AND #18</p> |
| <b>CENTRAL</b> | <p>TITLE-ABSTRACT- KEYWORDS (Sodium Glucose co-transporter 2 OR SGLT2 OR SGLT-2 OR SGLT 2 OR Tofogliflozin OR Empagliflozin OR Dapagliflozin OR Canagliflozin OR Sotagliflozin OR luseogliflozin OR Ipragliflozin OR Remogliflozin OR Sergliflozin OR Ertugliflozin OR DPP-4 OR DDP4 OR DPP 4 OR Vildagliptin</p>                                                                                                                                                                                                                                                                                                                                                                                                                                                                                                                                                                                                                                                                                                                                                                                                                                                       |

OR Saxagliptin OR Sitagliptin OR Linagliptin OR Alogliptin OR  
Dutogliptin OR Gemigliptin OR Camegliptin OR Teneigliptin OR  
Metformin OR GLP-1 OR Exenatide OR Liraglutide OR Lixisenatide  
OR Albiglutide OR Dulaglutide OR Semaglutide OR Taspoglutide  
OR Insulin OR Aspart OR Glulisine OR Lispro OR Glargine OR  
Degludec OR Detemir OR Isophane OR Alpha glucosidase inhibitor  
OR Acarbose OR Miglitol OR Voglibose OR Glitazone OR  
Thiazolidinedione OR Pioglitazone OR Rivoglitazone OR  
Rosiglitazone) AND (Diabetes mellitus or Diabetes)

**Embase**

TITLE-ABSTRACT-AUTHOR KEYWORDS (Sodium Glucose co-  
transporter 2 OR SGLT2 OR SGLT-2 OR SGLT 2 OR Tofogliflozin  
OR Empagliflozin OR Dapagliflozin OR Canagliflozin OR  
Sotagliflozin OR luseogliflozin OR Ipragliflozin OR Remogliflozin  
OR Sergliflozin OR Ertugliflozin OR DPP-4 OR DDP4 OR DPP 4  
OR Vildagliptin OR Saxagliptin OR Sitagliptin OR Linagliptin OR  
Alogliptin OR Dutogliptin OR Gemigliptin OR Camegliptin OR  
Teneigliptin OR Metformin OR GLP-1 OR Exenatide OR Liraglutide  
OR Lixisenatide OR Albiglutide OR Dulaglutide OR Semaglutide OR  
Taspoglutide OR Insulin OR Aspart OR Glulisine OR Lispro OR  
Glargine OR Degludec OR Detemir OR Isophane OR Alpha  
glucosidase inhibitor OR Acarbose OR Miglitol OR Voglibose OR  
Glitazone OR Thiazolidinedione OR Pioglitazone OR Rivoglitazone  
OR Rosiglitazone) AND (RCT\* OR random\*)
