# Supplementary material for: Comparison of antidiabetic drugs added to sulfonylurea monotherapy in patients with type 2 diabetes mellitus: A network meta-analysis
Source: PubMed Central journal article supplement (PMC6110472; doi:10.1371/journal.pone.0202563), 2018-08-27
Supplement: pone.0202563.s003.pdf [file pone.0202563.s003.pdf]

**S3 Table.** Number of total participants and participants with events according to safety outcome and study

| Author, year                        | Hypoglycemia |                         | Serious adverse event |                         |
|-------------------------------------|--------------|-------------------------|-----------------------|-------------------------|
|                                     | Participants | Participants with event | Participants          | Participants with event |
| Ba 2017 <sup>1</sup>                | -            | -                       | -                     | -                       |
| Gantz 2017 <sup>2</sup>             | 189          | 10                      | 189                   | 2                       |
| Yang 2015 <sup>3</sup>              | 278          | 0                       | 278                   | 2                       |
| Hermansen 2007 <sup>4</sup>         | 212          | 11                      | 212                   | 11                      |
| Barnett 2013 <sup>5</sup>           | 138          | 36                      | 138                   | 12                      |
| Garber 2008 <sup>6</sup>            | 515          | 9                       | 515                   | 18                      |
| Pratley 2009 <sup>7</sup>           | 500          | 62                      | 500                   | 24                      |
| Chacra 2009 <sup>8</sup>            | 768          | 97                      | 768                   | 16                      |
| Yale 2017 <sup>9</sup>              | 215          | 29                      | 215                   | 25                      |
| Dungan 2016 <sup>10</sup>           | 299          | 52                      | 299                   | 9                       |
| Forst 2015 <sup>11</sup>            | 161          | 35                      | 161                   | 17                      |
| Strojek 2014 <sup>12</sup>          | 596          | 57                      | 596                   | 58                      |
| Hsieh 2011 <sup>13</sup>            | 98           | 37                      | -                     | -                       |
| Scheen 2009 <sup>14</sup>           | 1001         | 173                     | 1001                  | 447                     |
| Marre 2009 <sup>15</sup>            | 1041         | 65                      | -                     | -                       |
| Seufert 2008 <sup>16</sup>          | 639          | 86                      | -                     | -                       |
| Davidson 2007 <sup>17</sup>         | 245          | 9                       | -                     | -                       |
| Buse 2004 <sup>18</sup>             | 377          | 68                      | 377                   | 19                      |
| Araki 2015 <sup>19</sup>            | 336          | 20                      | 336                   | 20                      |
| Kobayashi 2014 <sup>20</sup>        | 114          | 5                       | 114                   | 2                       |
| Wolffenbuttel<br>2000 <sup>21</sup> | 574          | 21                      | -                     | -                       |
| Kaku 2010 <sup>22</sup>             | 264          | 5                       | 264                   | 8                       |
| Zhu 2003 <sup>23</sup>              | 554          | 42                      | -                     | -                       |
| Bachmann 2003 <sup>24</sup>         | 372          | 10                      | 372                   | 40                      |
| <b>Total RCTs</b>                   |              | <b>23</b>               |                       | <b>17</b>               |
| <b>Total</b>                        | <b>9486</b>  | <b>939</b>              | <b>6335</b>           | <b>730</b>              |
