# Supplementary material for: Comparison of antidiabetic drugs added to sulfonylurea monotherapy in patients with type 2 diabetes mellitus: A network meta-analysis
Source: PubMed Central journal article supplement (PMC6110472; doi:10.1371/journal.pone.0202563), 2018-08-27
Supplement: pone.0202563.s004.pdf [file pone.0202563.s004.pdf]

**S4 Table.** Number of participants by efficacy outcome and study

| <b>Author, year</b>              | <b>HbA1c</b> | <b>FPG</b>  | <b>Body Weight</b> |
|----------------------------------|--------------|-------------|--------------------|
| Ba 2017 <sup>1</sup>             | 256          | 256         | -                  |
| Gantz 2017 <sup>2</sup>          | 189          | 189         | 189                |
| Yang 2015 <sup>3</sup>           | 279          | 279         | -                  |
| Hermansen 2007 <sup>4</sup>      | 206          | 206         | -                  |
| Barnett 2013 <sup>5</sup>        | 123          | -           | -                  |
| Garber 2008 <sup>6</sup>         | 408          | 408         | 408                |
| Pratley 2009 <sup>7</sup>        | 495          | 498         | 488                |
| Chacra 2009 <sup>8</sup>         | 760          | 764         |                    |
| Yale 2017 <sup>9</sup>           | 215          | 215         | -                  |
| Dungan 2016 <sup>10</sup>        | 299          | 299         | 299                |
| Forst 2015 <sup>11</sup>         | 161          | -           | -                  |
| Strojek 2014 <sup>12</sup>       | 592          | 592         | 592                |
| Hsieh 2011 <sup>13</sup>         | 100          | 100         | -                  |
| Scheen 2009 <sup>14</sup>        | 1001         | -           | 1001               |
| Marre 2009 <sup>15</sup>         | 1041         | -           | 466                |
| Seufert 2008 <sup>16</sup>       | 639          | 639         | -                  |
| Davidson 2007 <sup>17</sup>      | 233          | 233         | -                  |
| Buse 2004 <sup>18</sup>          | 377          | 377         | 377                |
| Araki 2015 <sup>19</sup>         | 312          | 312         | 312                |
| Kobayashi 2014 <sup>20</sup>     | 120          | 120         | 120                |
| Wolffenbuttel 2000 <sup>21</sup> | -            | -           | -                  |
| Kaku 2010 <sup>22</sup>          | 264          | 264         | 264                |
| Zhu 2003 <sup>23</sup>           | 530          | 530         | -                  |
| Bachmann 2003 <sup>24</sup>      | 330          | 330         | -                  |
| <b>Total RCTs</b>                | <b>23</b>    | <b>19</b>   | <b>11</b>          |
| <b>Total participants</b>        | <b>8930</b>  | <b>6611</b> | <b>4516</b>        |

Note: HbA1c, glycated hemoglobin; FPG, fasting plasma glucose.
