# Supplementary material for: Comparison of antidiabetic drugs added to sulfonylurea monotherapy in patients with type 2 diabetes mellitus: A network meta-analysis
Source: PubMed Central journal article supplement (PMC6110472; doi:10.1371/journal.pone.0202563), 2018-08-27
Supplement: pone.0202563.s005.pdf [file pone.0202563.s005.pdf]

**S5 Table.** Numbers of arms, participants, and participants with events by safety outcome and drug

| <b>Drug: Sulphonylurea +</b> | <b>Number of</b>               | <b>Hypoglycemia</b> | <b>Serious adverse event</b> |
|------------------------------|--------------------------------|---------------------|------------------------------|
| SGLT-2i                      | Arms                           | 3                   | 3                            |
|                              | Participants with event        | 81                  | 76                           |
|                              | Participants                   | 869                 | 869                          |
| DPP-4i                       | Arms                           | 9                   | 9                            |
|                              | Participants with event        | 187                 | 70                           |
|                              | Participants                   | 1852                | 1852                         |
| GLP-1                        | Arms                           | 4                   | 3                            |
|                              | Participants with event        | 170                 | 23                           |
|                              | Participants                   | 1364                | 669                          |
| TZD                          | Arms                           | 6                   | 1                            |
|                              | Participants with event        | 221                 | 217                          |
|                              | Participants                   | 2004                | 508                          |
| Met                          | Arms                           | 2                   | 1                            |
|                              | Participants with event        | 55                  | 3                            |
|                              | Participants                   | 383                 | 63                           |
| AGI                          | Arms                           | 3                   | 2                            |
|                              | Participants with event        | 31                  | 21                           |
|                              | Participants                   | 297                 | 238                          |
| Basal                        | Arms                           | 1                   | 1                            |
|                              | Participants with event        | 23                  | 6                            |
|                              | Participants                   | 79                  | 79                           |
| PLA                          | Arms                           | 19                  | 14                           |
|                              | Participants with event        | 171                 | 314                          |
|                              | Participants                   | 2638                | 2057                         |
| <b>Total number of</b>       |                                |                     |                              |
|                              | <b>Arms</b>                    | 47                  | 34                           |
|                              | <b>Participants with event</b> | 939                 | 730                          |
|                              | <b>Participants</b>            | 9486                | 6335                         |

Note: SGLT-2i, sodium-glucose co-transporter-2 inhibitor; DPP-4i, dipeptidyl peptidase-4 inhibitor; GLP-1, glucagon-like peptide-1 receptor agonist; AGI,  $\alpha$ -glucosidase inhibitor; TZD, thiazolidinedione; Met, metformin; Basal, basal (long acting) insulin, PLA, placebo.
