# Supplementary material for: Comparison of antidiabetic drugs added to sulfonylurea monotherapy in patients with type 2 diabetes mellitus: A network meta-analysis
Source: PubMed Central journal article supplement (PMC6110472; doi:10.1371/journal.pone.0202563), 2018-08-27
Supplement: pone.0202563.s006.pdf [file pone.0202563.s006.pdf]

**S6 Table.** Numbers of arms and participants by efficacy outcome and drug

| <b>Drug: Sulphonylurea</b><br>+ | <b>Number of</b> | <b>HbA1c</b> | <b>FPG</b>  | <b>Body Weight</b> |
|---------------------------------|------------------|--------------|-------------|--------------------|
| SGLT-2i                         | Arms             | 3            | 3           | 2                  |
|                                 | Participants     | 844          | 844         | 698                |
| DPP-4i                          | Arms             | 10           | 8           | 4                  |
|                                 | Participants     | 1885         | 1726        | 842                |
| GLP-1                           | Arms             | 4            | 3           | 4                  |
|                                 | Participants     | 1364         | 669         | 903                |
| TZD                             | Arms             | 5            | 3           | 2                  |
|                                 | Participants     | 1601         | 861         | 740                |
| Met                             | Arms             | 2            | 2           | 1                  |
|                                 | Participants     | 381          | 381         | 61                 |
| AGI                             | Arms             | 3            | 3           | 1                  |
|                                 | Participants     | 273          | 273         | 60                 |
| Basal                           | Arms             | 1            | -           |                    |
|                                 | Participants     | 79           | -           |                    |
| PLA                             | Arms             | 19           | 16          | 8                  |
|                                 | Participants     | 2503         | 1857        | 1212               |
| <b>Total number of</b>          |                  |              |             |                    |
| <b>Arms</b>                     |                  | <b>47</b>    | <b>38</b>   | <b>22</b>          |
| <b>Participants</b>             |                  | <b>8930</b>  | <b>6611</b> | <b>4516</b>        |

Note: HbA1c, glyated hemoglobin; FPG, fasting plasma glucose; SGLT-2i, sodium-glucose co-transporter-2 inhibitor; DPP-4i, dipeptidyl peptidase-4 inhibitor; GLP-1, glucagon-like peptide-1 receptor agonist; AGI,  $\alpha$ -glucosidase inhibitor; TZD, thiazolidinedione; Met, metformin; Basal, basal (long acting) insulin, PLA, placebo.
