# Supplementary material for: Comparison of antidiabetic drugs added to sulfonylurea monotherapy in patients with type 2 diabetes mellitus: A network meta-analysis
Source: PubMed Central journal article supplement (PMC6110472; doi:10.1371/journal.pone.0202563), 2018-08-27
Supplement: pone.0202563.s008.pdf [file pone.0202563.s008.pdf]

**S8 Table.** Assessment of the loop inconsistency within networks

| Loop                         | Inconsistency factor | 95% confidence interval | P-value | Loop heterogeneity tau <sup>2</sup> |
|------------------------------|----------------------|-------------------------|---------|-------------------------------------|
| <b>HbA1c</b>                 |                      |                         |         |                                     |
| PLA-SGLT2-TZD-Basal          | 0.475                | 0.00-1.76               | 0.468   | 0.145                               |
| PLA-GLP1-TZD                 | 0.447                | 0.00-1.40               | 0.357   | 0.139                               |
| PLA-DPP4-Met                 | 0.017                | 0.00-0.44               | 0.939   | 0.005                               |
| <b>FPG</b>                   |                      |                         |         |                                     |
| PLA-SGLT2-TZD-AGI            | 1.493                | 0.00-3.99               | 0.241   | 0.439                               |
| PLA-DPP4-Met                 | 0.065                | 0.00-1.00               | 0.891   | 0.007                               |
| <b>Body weight</b>           |                      |                         |         |                                     |
| PLA-GLP1-TZD                 | 2.221                | 0.00-5.47               | 0.180   | 0.000                               |
| <b>Hypoglycemia</b>          |                      |                         |         |                                     |
| PLA-DPP4-Met                 | 0.915                | 0.00-2.96               | 0.380   | 0.018                               |
| PLA-SGLT2-TZD-AGI            | 0.561                | 0.00-2.27               | 0.521   | 0.083                               |
| PLA-GLP1-TZD                 | 0.183                | 0.00-1.75               | 0.819   | 0.184                               |
| <b>Serious adverse event</b> |                      |                         |         |                                     |
| PLA-DPP4-Basal               | 0.029                | 0.00-2.94               | 0.985   | 0.000                               |

Note: HbA1c, glycated hemoglobin; FPG, fasting plasma glucose; SGLT2, sodium-glucose co-transporter-2 inhibitor; DPP4, dipeptidyl peptidase-4 inhibitor; GLP1, glucagon-like peptide-1 receptor agonist; AGI,  $\alpha$ -glucosidase inhibitor; TZD, thiazolidinedione; Met, metformin; Basal, basal (long acting) insulin, PLA, placebo.
