# Supplementary material for: Comparison of antidiabetic drugs added to sulfonylurea monotherapy in patients with type 2 diabetes mellitus: A network meta-analysis
Source: PubMed Central journal article supplement (PMC6110472; doi:10.1371/journal.pone.0202563), 2018-08-27
Supplement: pone.0202563.s009.pdf [file pone.0202563.s009.pdf]

**S9 Table.** Assessment of global inconsistency within networks using the ‘design-by-treatment’ model

| <b>Network outcome</b>       | <b>Chi square</b> | <b>P value for test of global inconsistency</b> |
|------------------------------|-------------------|-------------------------------------------------|
| <b>HbA1c</b>                 | 3.52              | 0.4745                                          |
| <b>FPG</b>                   | 5.43              | 0.0663                                          |
| <b>Body weight</b>           | 1.80              | 0.1800                                          |
| <b>Hypoglycemia</b>          | 3.81              | 0.4329                                          |
| <b>Serious adverse event</b> | 0.00              | 0.9966                                          |

Note: HbA1c, glycated hemoglobin; FPG, fasting plasma glucose.
