# Supplementary material for: Comparison of antidiabetic drugs added to sulfonylurea monotherapy in patients with type 2 diabetes mellitus: A network meta-analysis
Source: PubMed Central journal article supplement (PMC6110472; doi:10.1371/journal.pone.0202563), 2018-08-27
Supplement: pone.0202563.s011.pdf [file pone.0202563.s011.pdf]

**S11 Table.** Pairwise random-effects meta-analyses of hypoglycemia and serious adverse events

| Outcomes                     | Drug A  | Drug B | No. of trials | No. of participants | No. of participants with event | Odds Ratio (95% CI) | I <sup>2</sup> (%) | Tau <sup>2</sup> |
|------------------------------|---------|--------|---------------|---------------------|--------------------------------|---------------------|--------------------|------------------|
| <b>Hypoglycemia</b>          | SGLT-2i | PLA    | 2             | 811                 | 86                             | 1.23 [0.70, 2.18]   | 10                 | 0.02             |
|                              | SGLT-2i | Met    | 1             | 366                 | 20                             | 0.67 [0.24, 1.93]   | /                  | /                |
|                              | DPP-4i  | PLA    | 7             | 2600                | 225                            | 1.54 [1.10, 2.15]   | 0                  | 0                |
|                              | DPP-4i  | Basal  | 1             | 161                 | 35                             | 0.42 [0.19, 0.91]   | /                  | /                |
|                              | DPP-4i  | AGI    | 1             | 114                 | 5                              | 0.61 [0.10, 3.78]   | /                  | /                |
|                              | GLP-1   | PLA    | 3             | 940                 | 125                            | 7.56 [3.44, 16.59]  | 0                  | 0                |
|                              | GLP-1   | TZD    | 1             | 927                 | 62                             | 1.80 [0.90, 3.59]   | /                  | /                |
|                              | TZD     | PLA    | 4             | 2374                | 245                            | 2.87 [1.21, 6.81]   | 50                 | 0.36             |
|                              | TZD     | Met    | 1             | 639                 | 86                             | 0.69 [0.43, 1.09]   | /                  | /                |
|                              | AGI     | PLA    | 2             | 470                 | 47                             | 1.49 [0.24, 9.26]   | 77                 | 1.36             |
| <b>Serious adverse event</b> | SGLT-2i | PLA    | 2             | 811                 | 83                             | 0.84 [0.42, 1.67]   | 41                 | 0.1              |
|                              | SGLT-2i | Met    | 1             | 336                 | 20                             | 1.33 [0.38, 4.68]   | /                  | /                |
|                              | DPP-4i  | PLA    | 7             | 2600                | 85                             | 0.94 [0.57, 1.55]   | 0                  | 0                |
|                              | DPP-4i  | Basal  | 1             | 161                 | 17                             | 1.88 [0.66, 5.37]   | /                  | /                |
|                              | DPP-4i  | AGI    | 1             | 114                 | 2                              | 0.93 [0.06, 15.26]  | /                  | /                |
|                              | GLP-1   | PLA    | 3             | 940                 | 36                             | 0.71 [0.24, 2.08]   | 35                 | 0.34             |
|                              | TZD     | PLA    | 1             | 1001                | 447                            | 0.85 [0.66, 1.09]   | /                  | /                |
|                              | AGI     | PLA    | 1             | 372                 | 40                             | 1.04 [0.54, 2.00]   | /                  | /                |

Note: SGLT-2i, sodium-glucose co-transporter-2 inhibitor; DPP-4i, dipeptidyl peptidase-4 inhibitor; GLP-1, glucagon-like peptide-1 receptor agonist; AGI,  $\alpha$ -glucosidase inhibitor; TZD, thiazolidinedione; Met, metformin; Basal, basal (long acting) insulin, PLA, placebo.
