# Supplementary material for: Comparison of antidiabetic drugs added to sulfonylurea monotherapy in patients with type 2 diabetes mellitus: A network meta-analysis
Source: PubMed Central journal article supplement (PMC6110472; doi:10.1371/journal.pone.0202563), 2018-08-27
Supplement: pone.0202563.s012.pdf [file pone.0202563.s012.pdf]

**S12 Table.** Pairwise random-effects meta-analyses of HbA1c, fasting plasma glucose, and body weight

| Outcomes                | Drug A  | Drug B | No. of trials | No. of participants | Mean Difference (95% CI) | I <sup>2</sup> (%) | Tau <sup>2</sup> |
|-------------------------|---------|--------|---------------|---------------------|--------------------------|--------------------|------------------|
| <b>HbA1c (%)</b>        | SGLT-2i | PLA    | 2             | 807                 | -0.55 (-0.71, -0.39)     | 0                  | 0                |
|                         | SGLT-2i | Met    | 1             | 312                 | 0.02 (-0.15, 0.19)       | /                  | /                |
|                         | DPP-4i  | PLA    | 8             | 2716                | -0.68 (-0.77, -0.60)     | 49                 | 0.01             |
|                         | DPP-4i  | Basal  | 1             | 161                 | 0.30 (0.05, 0.55)        | /                  | /                |
|                         | DPP-4i  | AGI    | 1             | 120                 | -0.10 (-0.34, 0.14)      | /                  | /                |
|                         | GLP-1   | PLA    | 3             | 940                 | -1.05 (-1.35, -0.76)     | 74                 | 0.05             |
|                         | GLP-1   | TZD    | 1             | 927                 | -0.49 (-0.64, -0.34)     | /                  | /                |
|                         | TZD     | PLA    | 3             | 1877                | -1.04 (-1.64, -0.44)     | 95                 | 0.27             |
|                         | TZD     | Met    | 1             | 639                 | 0.13 (-0.06, 0.32)       | /                  | /                |
|                         | AGI     | PLA    | 2             | 430                 | -0.60 (-0.83, -0.37)     | 0                  | 0                |
| <b>FPG (mmol/l)</b>     | SGLT-2i | PLA    | 2             | 807                 | -1.56 (-2.20, -0.93)     | 61                 | 0.13             |
|                         | SGLT-2i | Met    | 1             | 312                 | -0.44 (-0.73, -0.15)     | /                  | /                |
|                         | DPP-4i  | PLA    | 7             | 2600                | -0.62 (-0.78, -0.47)     | 29                 | 0.01             |
|                         | DPP-4i  | AGI    | 1             | 120                 | 0.11 (-0.64, 0.86)       | /                  | /                |
|                         | GLP-1   | PLA    | 3             | 940                 | -1.46 (-2.04, -0.88)     | 57                 | 0.15             |
|                         | TZD     | PLA    | 2             | 763                 | -2.77 (-4.14, -1.40)     | 88                 | 0.86             |
|                         | TZD     | Met    | 1             | 639                 | -0.10 (-0.55, 0.35)      | /                  | /                |
|                         | AGI     | PLA    | 2             | 430                 | -0.78 (-1.29, -0.28)     | 0                  | 0                |
| <b>Body weight (kg)</b> | SGLT-2i | PLA    | 1             | 592                 | -1.00 (-1.73, -0.27)     | /                  | /                |
|                         | SGLT-2i | Met    | 1             | 312                 | -2.45 (-3.10, -1.80)     | /                  | /                |
|                         | DPP-4i  | PLA    | 3             | 1085                | 1.00 (0.90, 1.11)        | 0                  | 0                |
|                         | DPP-4i  | AGI    | 1             | 120                 | 1.30 (0.62, 1.98)        | /                  | /                |
|                         | GLP-1   | PLA    | 3             | 940                 | -0.62 (-1.17, -0.08)     | 0                  | 0                |
|                         | TZD     | Met    | 1             | 466                 | -2.30 (-3.20, -1.40)     | /                  | /                |

Note: HbA1c, glycated hemoglobin; FPG, fasting plasma glucose; SGLT-2i, sodium-glucose co-transporter-2 inhibitor; DPP-4i, dipeptidyl peptidase-4 inhibitor; GLP-1, glucagon-like peptide-1 receptor agonist; AGI,  $\alpha$ -glucosidase inhibitor; TZD, thiazolidinedione; Met, metformin; Basal, basal (long acting) insulin, PLA, placebo.
