# Supplementary material for: Comparison of antidiabetic drugs added to sulfonylurea monotherapy in patients with type 2 diabetes mellitus: A network meta-analysis
Source: PubMed Central journal article supplement (PMC6110472; doi:10.1371/journal.pone.0202563), 2018-08-27
Supplement: pone.0202563.s013.pdf [file pone.0202563.s013.pdf]

**S1 Fig.** The distribution of study-level characteristics according to drug class

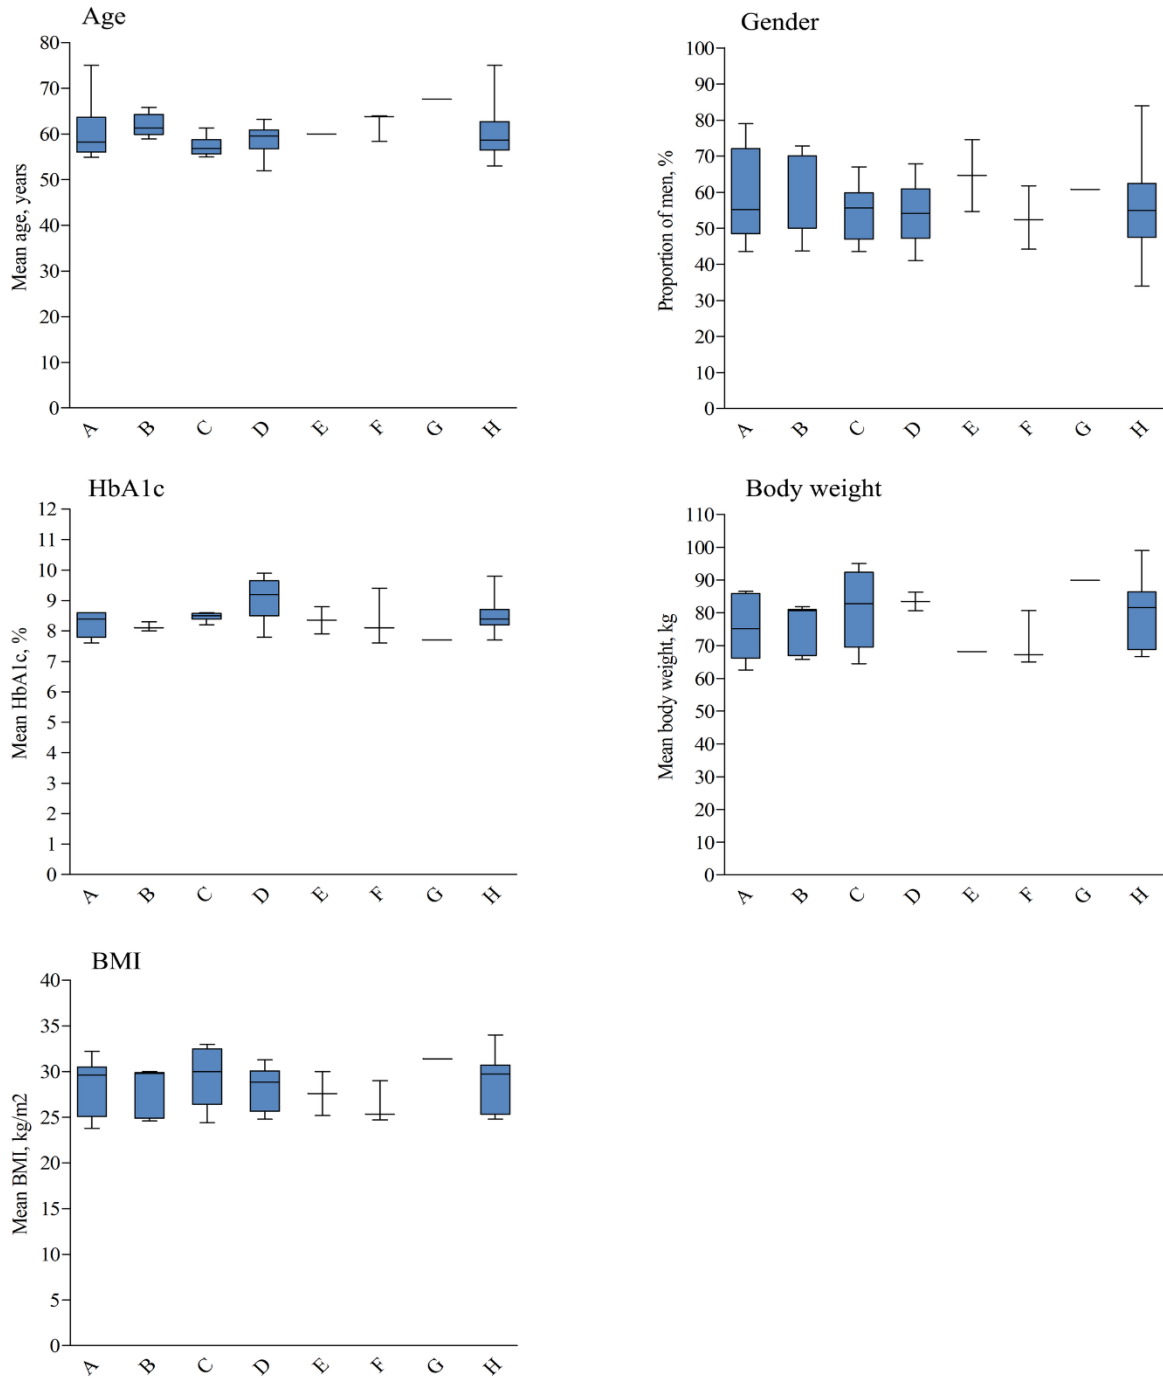

Note: A, dipeptidyl peptidase-4 inhibitor; B, sodium-glucose co-transporter-2 inhibitor; C, glucagon-like peptide-1 receptor agonist; D, thiazolidinedione; E, metformin; F,  $\alpha$ -glucosidase inhibitor; G, basal (long acting) insulin; H, placebo. The limits of the boxes represent the 25th and 75th centile, the middle line represents the median, and the error bars show the adjacent values.
