# Supplementary material for: Comparison of antidiabetic drugs added to sulfonylurea monotherapy in patients with type 2 diabetes mellitus: A network meta-analysis
Source: PubMed Central journal article supplement (PMC6110472; doi:10.1371/journal.pone.0202563), 2018-08-27

**S2 Figure.** Cochrane system bias evaluation chart of eligible studies

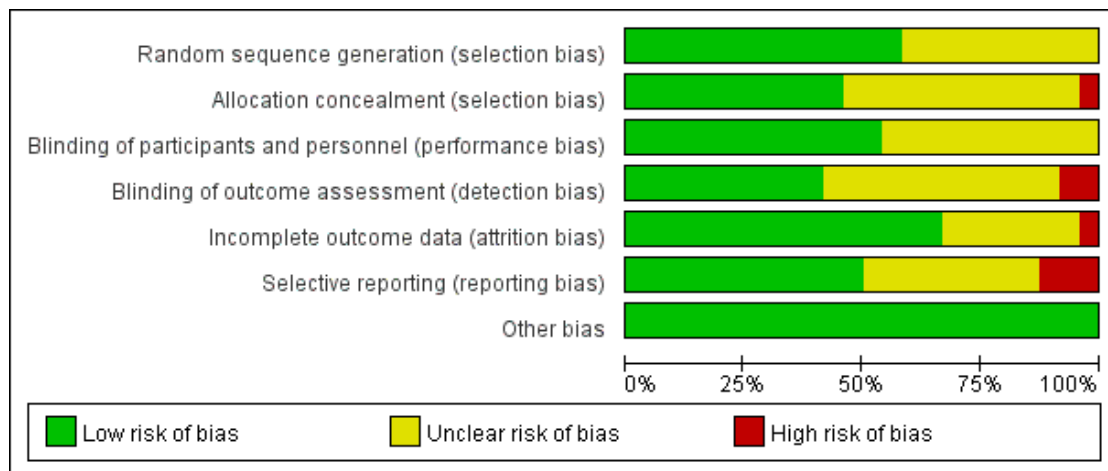

Supplement: pone.0202563.s014.pdf [file pone.0202563.s014.pdf]
