# Supplementary material for: Comparison of antidiabetic drugs added to sulfonylurea monotherapy in patients with type 2 diabetes mellitus: A network meta-analysis
Source: PubMed Central journal article supplement (PMC6110472; doi:10.1371/journal.pone.0202563), 2018-08-27
Supplement: pone.0202563.s015.pdf [file pone.0202563.s015.pdf]

**S3 Figure.** Comparison-adjusted funnel plot for efficacy and safety outcomes

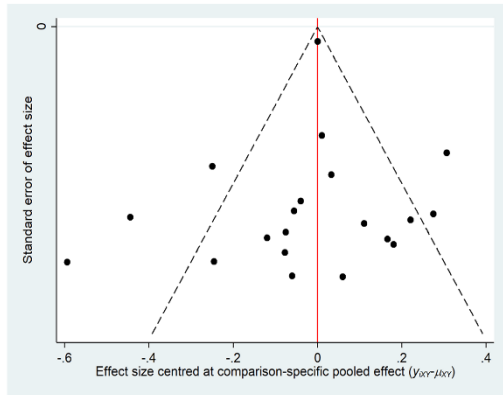

**HbA1c**

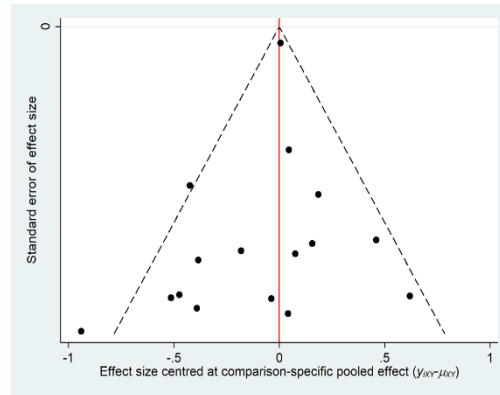

**Fasting plasma glucose**

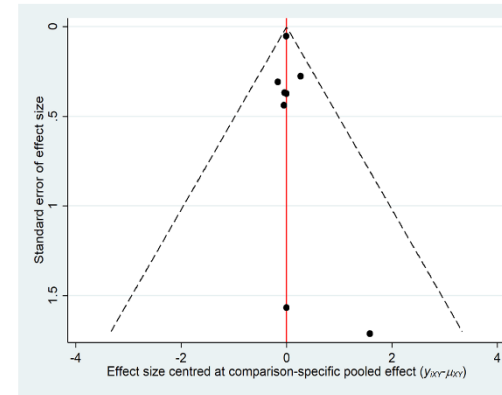

**Body weight**

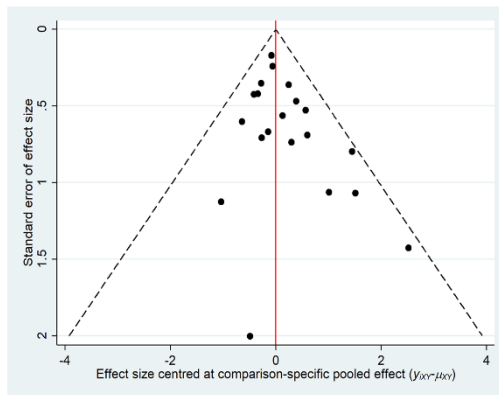

**Hypoglycemia**

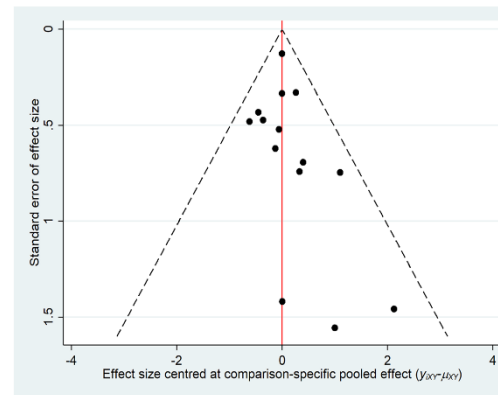

**Serious adverse event**
